# Supplementary material for: Development of Hydrolysis Probe-Based qPCR Assays for Panax ginseng and Panax quinquefolius for Detection of Adulteration in Ginseng Herbal Products
Source: MDPI journal article supplement (doi:10.3390/foods10112705), 2021-11-05
Supplement: s1 [file s1]

## Supplementary Information:

**Table S1. Commercially labelled ginseng products used for authentication testing by both *P. ginseng* and *P. quinquefolius* assays.**

| Sample Code  | Species              | Product type | Sample Code | Species                    | Product type |
|--------------|----------------------|--------------|-------------|----------------------------|--------------|
| 179NAT       | <i>Panax ginseng</i> | root powder  | 347NAT      | <i>Panax quinquefolius</i> | root         |
| 180NAT       | <i>Panax ginseng</i> | root powder  | 348NAT      | <i>Panax quinquefolius</i> | root         |
| 182NAT       | <i>Panax ginseng</i> | root powder  | 249NAT      | <i>Panax quinquefolius</i> | root         |
| 183NAT       | <i>Panax ginseng</i> | root powder  | 351NAT      | <i>Panax quinquefolius</i> | powder       |
| 184NAT       | <i>Panax ginseng</i> | root powder  | 14NAT       | <i>Panax quinquefolius</i> | root         |
| 201NAT       | <i>Panax ginseng</i> | root powder  | 17NAT       | <i>Panax quinquefolius</i> | root         |
| 342NAT       | <i>Panax ginseng</i> | root powder  | 339NAT      | <i>Panax quinquefolius</i> | root         |
| 350NAT       | <i>Panax ginseng</i> | root powder  | 415NAT      | <i>Panax quinquefolius</i> | root         |
| 401NAT       | <i>Panax ginseng</i> | root powder  | BRM803      | <i>Panax quinquefolius</i> | root         |
| 487NAT       | <i>Panax ginseng</i> | root powder  | 112NBT      | <i>Panax quinquefolius</i> | root         |
| 488NAT       | <i>Panax ginseng</i> | root powder  | 406NW       | <i>Panax quinquefolius</i> | powder       |
| 3IND         | <i>Panax ginseng</i> | root powder  | 1084NW      | <i>Panax quinquefolius</i> | powder       |
| 227BI        | <i>Panax ginseng</i> | root powder  | TNP1        | <i>Panax quinquefolius</i> | powder       |
| 125NAT       | <i>Panax ginseng</i> | root powder  | 7PR         | <i>Panax quinquefolius</i> | powder       |
| 236NAT       | <i>Panax ginseng</i> | leaf         | 8PR         | <i>Panax quinquefolius</i> | powder       |
| 280NAT       | <i>Panax ginseng</i> | leaf         | 24PR        | <i>Panax quinquefolius</i> | powder       |
| 368NAT       | <i>Panax ginseng</i> | leaf         | BRM705      | <i>Panax quinquefolius</i> | leaf         |
| 385NAT       | <i>Panax ginseng</i> | leaf         | BRM871      | <i>Panax quinquefolius</i> | leaf         |
| 431NAT       | <i>Panax ginseng</i> | leaf         | PQ21        | <i>Panax quinquefolius</i> | leaf         |
| NAT-Nov-2020 | <i>Panax ginseng</i> | leaf         | PQ22        | <i>Panax quinquefolius</i> | root         |
| JFN1         | <i>Panax ginseng</i> | root         | PQ23        | <i>Panax quinquefolius</i> | leaf         |
| 104JA        | <i>Panax ginseng</i> | root         | PQ24        | <i>Panax quinquefolius</i> | leaf         |

|         |                      |      |          |                            |      |
|---------|----------------------|------|----------|----------------------------|------|
| 106JA   | <i>Panax ginseng</i> | root | PQ25     | <i>Panax quinquefolius</i> | root |
| 74NAT   | <i>Panax ginseng</i> | root | PQ26     | <i>Panax quinquefolius</i> | leaf |
| 264NAT  | <i>Panax ginseng</i> | root | PQ27     | <i>Panax quinquefolius</i> | root |
| 265NAT  | <i>Panax ginseng</i> | root | PQ28     | <i>Panax quinquefolius</i> | leaf |
| PHY1    | <i>Panax ginseng</i> | root | PQ29     | <i>Panax quinquefolius</i> | leaf |
| 86NW    | <i>Panax ginseng</i> | root | PQ30     | <i>Panax quinquefolius</i> | leaf |
| 287NW   | <i>Panax ginseng</i> | root | BRM903   | <i>Panax quinquefolius</i> | root |
| 99NBT   | <i>Panax ginseng</i> | root | OAC1570  | <i>Panax quinquefolius</i> | leaf |
| 106NBT  | <i>Panax ginseng</i> | root | OAC17943 | <i>Panax quinquefolius</i> | leaf |
| 107NBT  | <i>Panax ginseng</i> | root | OAC22568 | <i>Panax quinquefolius</i> | leaf |
| 108NBT  | <i>Panax ginseng</i> | root | OAC24225 | <i>Panax quinquefolius</i> | leaf |
| 109NBT  | <i>Panax ginseng</i> | root | OAC26065 | <i>Panax quinquefolius</i> | leaf |
| 110NBT  | <i>Panax ginseng</i> | root | OAC42034 | <i>Panax quinquefolius</i> | leaf |
| 111NBT  | <i>Panax ginseng</i> | root | OAC56582 | <i>Panax quinquefolius</i> | leaf |
| BRM661  | <i>Panax ginseng</i> | leaf | OAC56612 | <i>Panax quinquefolius</i> | leaf |
| BRM688  | <i>Panax ginseng</i> | leaf | OAC57071 | <i>Panax quinquefolius</i> | leaf |
| BRM689  | <i>Panax ginseng</i> | leaf | OAC74790 | <i>Panax quinquefolius</i> | leaf |
| BRM1039 | <i>Panax ginseng</i> | leaf | OAC92518 | <i>Panax quinquefolius</i> | leaf |
| NAT648  | <i>Panax ginseng</i> | leaf |          |                            |      |
| BRM804  | <i>Panax ginseng</i> | root |          |                            |      |

**Table S2. Primer and probe sequences for *P. ginseng* assay**

|            |                                                                    |
|------------|--------------------------------------------------------------------|
| Primer FWD | 5'- GTCTTGGATAGCCGCGATAAA -3'                                      |
| Primer REV | 5'- GGGACCCTAACCCTAAATATTCTT -3'                                   |
| Probe      | 5' - /56-FAM/ CTC ACG CCA /ZEN/ TAT CCG CCA TTC TGA /31AbkFQ/ - 3' |

Primer and probes sequences for *P. ginseng* assay were designed from full length chloroplast genome (KM067394). Length of the amplicon for this assay is around 90bp.

**Table S3. Primer and probe sequences for *P. quinquefolius* assay**

|            |                                                                 |
|------------|-----------------------------------------------------------------|
| Primer FWD | 5'- CCGGTTGCTTTCTGTCCATATAA -3'                                 |
| Primer REV | 5'- AACAGGGTCAGAGGGATCAA -3'                                    |
| Probe      | 5' - /56-FAM/TGC ATA CAG/ZEN/ CTC TAG TTG CCG GTT/31AbkFQ/ - 3' |

Primer and probes sequences for *P. quinquefolius* assay were designed from full length chloroplast genome (KT028714). Length of the amplicon for this assay is around 100bp.

**Table S4. Repeatability of the *P. ginseng* assay**

| Sample ID | Sample Type | Species                    | Date of Analysis | Ct    |       |       | Ct Mean | SD   | CV % |
|-----------|-------------|----------------------------|------------------|-------|-------|-------|---------|------|------|
| PG3       | Target      | <i>Panax ginseng</i>       | 31/05/2019       | 20.43 | 20.66 | 20.19 | 20.46   | 0.03 | 0.12 |
|           |             |                            | 15/06/2019       | 20.49 | 20.64 | 20.32 |         |      |      |
| PG11      | Target      | <i>Panax ginseng</i>       | 31/05/2019       | 20.13 | 20.32 | 20.11 | 20.82   | 0.63 | 3    |
|           |             |                            | 15/06/2019       | 21.38 | 21.51 | 21.44 |         |      |      |
| PG33      | Target      | <i>Panax ginseng</i>       | 31/05/2019       | 22.93 | 23.09 | 22.23 | 23.41   | 0.66 | 2.82 |
|           |             |                            | 15/06/2019       | 24.12 | 24    | 24.08 |         |      |      |
| PG61      | Target      | <i>Panax ginseng</i>       | 31/05/2019       | 20.46 | 20.54 | 20.08 | 21.25   | 0.89 | 4.19 |
|           |             |                            | 15/06/2019       | 21.48 | 22.23 | 22.71 |         |      |      |
| PG27      | Target      | <i>Panax ginseng</i>       | 31/05/2019       | 28.86 | 28.79 | 27.91 | 29.57   | 1.05 | 3.55 |
|           |             |                            | 15/06/2019       | 29.72 | 31.19 | 30.94 |         |      |      |
| PG12      | Target      | <i>Panax ginseng</i>       | 31/05/2019       | 20.14 | 20.39 | 20.21 | 20.94   | 0.69 | 3.3  |
|           |             |                            | 15/06/2019       | 21.27 | 21.85 | 21.76 |         |      |      |
| PG56      | Target      | <i>Panax ginseng</i>       | 31/05/2019       | 21.27 | 21.67 | 21.33 | 22.13   | 0.71 | 3.19 |
|           |             |                            | 15/06/2019       | 22.51 | 22.78 | 23.21 |         |      |      |
| PQ13      | Non-target  | <i>Panax quinquefolius</i> | 31/05/2019       | N/A   | N/A   | N/A   | N/A     | N/A  | N/A  |
|           |             |                            | 15/06/2019       | N/A   | N/A   | N/A   |         |      |      |
| PQ31      | Non-target  | <i>Panax quinquefolius</i> | 31/05/2019       | N/A   | N/A   | N/A   | N/A     | N/A  | N/A  |
|           |             |                            | 15/06/2019       | N/A   | N/A   | N/A   |         |      |      |
| PQ50      | Non-target  | <i>Panax quinquefolius</i> | 31/05/2019       | N/A   | N/A   | N/A   | N/A     | N/A  | N/A  |
|           |             |                            | 15/06/2019       | N/A   | N/A   | N/A   |         |      |      |

**Table S5. Reproducibility of the *P. ginseng* assay**

| Sample ID | Sample Type | Species                    | Date of Analysis | Ct    |       |       | Ct Mean | SD   | CV % |
|-----------|-------------|----------------------------|------------------|-------|-------|-------|---------|------|------|
| PG3       | Target      | <i>Panax ginseng</i>       | Operator 1       | 20.43 | 20.66 | 20.19 | 19.93   | 0.50 | 2.51 |
|           |             |                            | Operator 2       | 20.89 | 19.35 | 18.06 |         |      |      |
| PG11      | Target      | <i>Panax ginseng</i>       | Operator 1       | 20.13 | 20.32 | 20.11 | 19.9    | 0.30 | 1.48 |
|           |             |                            | Operator 2       | 19.84 | 19.63 | 19.34 |         |      |      |
| PG33      | Target      | <i>Panax ginseng</i>       | Operator 1       | 22.93 | 23.09 | 22.23 | 22.28   | 0.47 | 2.11 |
|           |             |                            | Operator 2       | 22.18 | 21.91 | 21.33 |         |      |      |
| PG61      | Target      | <i>Panax ginseng</i>       | Operator 1       | 20.46 | 20.54 | 20.08 | 20.03   | 0.34 | 1.67 |
|           |             |                            | Operator 2       | 20.46 | 19.74 | 18.88 |         |      |      |
| PG27      | Target      | <i>Panax ginseng</i>       | Operator 1       | 28.86 | 28.79 | 27.91 | 27.84   | 0.68 | 2.44 |
|           |             |                            | Operator 2       | 28.12 | 27.17 | 26.19 |         |      |      |
| PG12      | Target      | <i>Panax ginseng</i>       | Operator 1       | 20.14 | 20.39 | 20.21 | 20.76   | 0.51 | 2.46 |
|           |             |                            | Operator 2       | 21.98 | 21.36 | 20.46 |         |      |      |
| PG56      | Target      | <i>Panax ginseng</i>       | Operator 1       | 21.27 | 21.67 | 21.33 | 22.02   | 0.60 | 2.72 |
|           |             |                            | Operator 2       | 23.58 | 22.74 | 21.53 |         |      |      |
| PQ13      | Non-target  | <i>Panax quinquefolius</i> | Operator 1       | N/A   | N/A   | N/A   | N/A     | N/A  | N/A  |
|           |             |                            | Operator 2       | N/A   | N/A   | N/A   |         |      |      |
| PQ31      | Non-target  | <i>Panax quinquefolius</i> | Operator 1       | N/A   | N/A   | N/A   | N/A     | N/A  | N/A  |
|           |             |                            | Operator 2       | N/A   | N/A   | N/A   |         |      |      |
| PQ50      | Non-target  | <i>Panax quinquefolius</i> | Operator 1       | N/A   | N/A   | N/A   | N/A     | N/A  | N/A  |
|           |             |                            | Operator 2       | N/A   | N/A   | N/A   |         |      |      |

**Table S6. Repeatability of the *P. quinquefolius* assay**

| Sample ID | Sample Type | Species                    | Date of Analysis | Ct    |       |       | Ct Mean | SD   | CV % |
|-----------|-------------|----------------------------|------------------|-------|-------|-------|---------|------|------|
| PQ6       | Target      | <i>Panax quinquefolius</i> | 30/04/2019       | 19.84 | 20.67 | 19.55 | 20.32   | 0.30 | 1.45 |
|           |             |                            | 22/05/2019       | 20.73 | 20.87 | 20.22 |         |      |      |
| PQ7       | Target      | <i>Panax quinquefolius</i> | 30/04/2019       | 21.11 | 20.94 | 20.81 | 20.91   | 0.04 | 0.19 |
|           |             |                            | 22/05/2019       | 20.86 | 20.92 | 20.84 |         |      |      |
| PQ50      | Target      | <i>Panax quinquefolius</i> | 30/04/2019       | 22.28 | 22.43 | 22.13 | 22.38   | 0.10 | 0.45 |
|           |             |                            | 22/05/2019       | 22.5  | 22.49 | 22.46 |         |      |      |
| PQ9       | Target      | <i>Panax quinquefolius</i> | 30/04/2019       | 21.25 | 21.55 | 21.1  | 21.47   | 0.17 | 0.77 |
|           |             |                            | 22/05/2019       | 21.66 | 21.87 | 21.35 |         |      |      |
| PG3       | Non-target  | <i>Panax ginseng</i>       | 30/04/2019       | N/A   | N/A   | N/A   | N/A     | N/A  | N/A  |
|           |             |                            | 22/05/2019       | N/A   | N/A   | N/A   |         |      |      |
| PG11      | Non-target  | <i>Panax ginseng</i>       | 30/04/2019       | N/A   | N/A   | N/A   | N/A     | N/A  | N/A  |
|           |             |                            | 22/05/2019       | N/A   | N/A   | N/A   |         |      |      |
| PG33      | Non-target  | <i>Panax ginseng</i>       | 30/04/2019       | N/A   | N/A   | N/A   | N/A     | N/A  | N/A  |
|           |             |                            | 22/05/2019       | N/A   | N/A   | N/A   |         |      |      |

**Table S7. Reproducibility of the *P. quinquefolius* assay**

| Sample ID | Sample Type | Species                    | Operator   | Ct    |       |       | Ct Mean | SD   | CV % |
|-----------|-------------|----------------------------|------------|-------|-------|-------|---------|------|------|
| PQ6       | Target      | <i>Panax quinquefolius</i> | Operator 1 | 19.84 | 20.67 | 19.55 | 20.41   | 0.39 | 1.91 |
|           |             |                            | Operator 2 | 20.99 | 21.33 | 20.08 |         |      |      |
| PQ7       | Target      | <i>Panax quinquefolius</i> | Operator 1 | 21.11 | 20.94 | 20.81 | 21.23   | 0.28 | 1.32 |
|           |             |                            | Operator 2 | 22.53 | 21.12 | 20.89 |         |      |      |
| PQ50      | Target      | <i>Panax quinquefolius</i> | Operator 1 | 22.28 | 22.43 | 22.13 | 22.5    | 0.22 | 0.96 |
|           |             |                            | Operator 2 | 23.38 | 22.8  | 21.94 |         |      |      |
| PQ9       | Target      | <i>Panax quinquefolius</i> | Operator 1 | 21.25 | 21.55 | 21.1  | 21.4    | 0.10 | 0.47 |
|           |             |                            | Operator 2 | 22.5  | 20.81 | 21.19 |         |      |      |
| PG3       | Non-target  | <i>Panax ginseng</i>       | Operator 1 | N/A   | N/A   | N/A   | N/A     | N/A  | N/A  |
|           |             |                            | Operator 2 | N/A   | N/A   | N/A   |         |      |      |
| PG11      | Non-target  | <i>Panax ginseng</i>       | Operator 1 | N/A   | N/A   | N/A   | N/A     | N/A  | N/A  |
|           |             |                            | Operator 2 | N/A   | N/A   | N/A   |         |      |      |
| PG33      | Non-target  | <i>Panax ginseng</i>       | Operator 1 | N/A   | N/A   | N/A   | N/A     | N/A  | N/A  |
|           |             |                            | Operator 2 | N/A   | N/A   | N/A   |         |      |      |

**Table S8. Amplicon sequences obtained from *Panax ginseng* commercial products**

|                                                              |
|--------------------------------------------------------------|
| >PHY1 _Pangiprobe                                            |
| CTCACGCCATATCCGCCATTCTGACCTTTTTCCAGTGAAAGAATATTGGGTTAGGGTCCC |
| >108NBT Pangiprobe                                           |
| CTCACGCCATATCCGCCATTCTGACCTTTTTCCAGTGAAAGAATATTGGGTTAGGGTCCC |
| >111NBT Pangiprobe                                           |
| CTCACGCCATATCCGCCATTCTGACCTTTTTCCAGTGAAAGAATATTGGGTTAGGGTCCC |
| >201NAT Pangiprobe                                           |
| CTCACGCCATATCCGCCATTCTGACCTTTTTCCAGTGAAAGAATATTGGGTTAGGGTCCC |
| >227BI Pangiprobe                                            |
| CTCACGCCATATCCGCCATTCTGACCTTTTTCCAGTGAAAGAATATTGGGTTAGGGTCCC |
| >236NAT Pangiprobe                                           |
| CTCACGCCATATCCGCCATTCTGACCTTTTTCCAGTGAAAGAATATTGGGTTAGGGTCCC |
| >249NAT Pangiprobe                                           |
| CTCACGCCATATCCGCCATTCTGACCTTTTTCCAGTGAAAGAATATTGGGTTAGGGTCCC |
| >287NW Pangiprobe                                            |
| CTCACGCCATATCCGCCATTCTGACCTTTTTCCAGTGAAAGAATATTGGGTTAGGGTCCC |
| >348NAT Pangiprobe                                           |
| CTCACGCCATATCCGCCATTCTGACCTTTTTCCAGTGAAAGAATATTGGGTTAGGGTCCC |
| >385NAT Pangiprobe                                           |
| CTCACGCCATATCCGCCATTCTGACCTTTTTCCAGTGAAAGAATATTGGGTTAGGGTCCC |
| >401NAT Pangiprobe                                           |
| CTCACGCCATATCCGCCATTCTGACCTTTTTCCAGTGAAAGAATATTGGGTTAGGGTCCC |
| >431NAT Pangiprobe                                           |
| CTCACGCCATATCCGCCATTCTGACCTTTTTCCAGTGAAAGAATATTGGGTTAGGGTCCC |
| >99NBT Pangiprobe                                            |
| CTCACGCCATATCCGCCATTCTGACCTTTTTCCAGTGAAAGAATATTGGGTTAGGGTCCC |
| >BRM1039 Pangiprobe                                          |
| CTCACGCCATATCCGCCATTCTGACCTTTTTCCAGTGAAAGAATATTGGGTTAGGGTCCC |
| >BRM661 Pangiprobe                                           |
| CTCACGCCATATCCGCCATTCTGACCTTTTTCCAGTGAAAGAATATTGGGTTAGGGTCCC |
| >339NAT Pangiprobe                                           |
| CTCACGCCATATCCGCCATTCTGACCTTTTTCCAGTGAAAGAATATTGGGTTAGGGTCCC |
| >109NBT Pangiprobe                                           |
| CTCACGCCATATCCGCCATTCTGACCTTTTTCCAGTGAAAGAATATTGGGTTAGGGTCCC |
| >110NBT Pangiprobe                                           |
| CTCACGCCATATCCGCCATTCTGACCTTTTTCCAGTGAAAGAATATTGGGTTAGGGTCCC |
| >415NAT Pangiprobe                                           |
| CTCACGCCATATCCGCCATTCTGACCTTTTTCCAGTGAAAGAATATTGGGTTAGGGTCCC |
| >104JA Pangiprobe                                            |
| CTCACGCCATATCCGCCATTCTGACCTTTTTCCAGTG-AAGAATATTGGGTTAGGGTCCC |
| >106JA Pangiprobe                                            |

|                                                                                                 |
|-------------------------------------------------------------------------------------------------|
| CTCACGCCATATCCGCCATTCTGACCTTTTCCAGTG-AAGAATATTTGGGTTAGGGTCCC                                    |
| >107NBT Pangiprobe                                                                              |
| CTCACGCCATATCCGCCATTCTGACCTTTTCCAGTG-AAGAATATTTGGGTTAGGGTCCC                                    |
| >125NAT Pangiprobe                                                                              |
| CTCACGCCATATCCGCCATTCTGACCTTTTCCAGTG-AAGAATATTTGGGTTAGGGTCCC                                    |
| >179NAT Pangiprobe                                                                              |
| CTCACGCCATATCCGCCATTCTGACCTTTTCCAGTG-AAGAATATTTGGGTTAGGGTCCC                                    |
| >180NAT Pangiprobe                                                                              |
| CTCACGCCATATCCGCCATTCTGACCTTTTCCAGTG-AAGAATATTTGGGTTAGGGTCCC                                    |
| >182NAT Pangiprobe                                                                              |
| CTCACGCCATATCCGCCATTCTGACCTTTTCCAGTG-AAGAATATTTGGGTTAGGGTCCC                                    |
| >183NAT Pangiprobe                                                                              |
| CTCACGCCATATCCGCCATTCTGACCTTTTCCAGTG-AAGAATATTTGGGTTAGGGTCCC                                    |
| >264NAT Pangiprobe (Labelled as <i>P. ginseng</i> but not amplified by <i>P. ginseng</i> probe) |
| CTCACCCCATATCCGCCATTCTGACCTTTTCCAGTG-AAGAATATTTGGGTTAGGGTCCC                                    |
| >265NAT Pangiprobe                                                                              |
| CTCACGCCATATCCGCCATTCTGACCTTTTCCAGTG-AAGAATATTTGGGTTAGGGTCCC                                    |
| >280NAT Pangiprobe                                                                              |
| CTCACGCCATATCCGCCATTCTGACCTTTTCCAGTG-AAGAATATTTGGGTTAGGGTCCC                                    |
| >342NAT Pangiprobe                                                                              |
| CTCACGCCATATCCGCCATTCTGACCTTTTCCAGTG-AAGAATATTTGGGTTAGGGTCCC                                    |
| >350NAT Pangiprobe (Labelled as <i>P. ginseng</i> but not amplified by <i>P. ginseng</i> probe) |
| CTCACCCCATATCCGCCATTCTGACCTTTTCCAGTG-AAGAATATTTGGGTTAGGGTCCC                                    |
| >3IND Pangiprobe                                                                                |
| CTCACGCCATATCCGCCATTCTGACCTTTTCCAGTG-AAGAATATTTGGGTTAGGGTCCC                                    |
| >487NAT Pangiprobe                                                                              |
| CTCACGCCATATCCGCCATTCTGACCTTTTCCAGTG-AAGAATATTTGGGTTAGGGTCCC                                    |
| >488NAT Pangiprobe                                                                              |
| CTCACGCCATATCCGCCATTCTGACCTTTTCCAGTG-AAGAATATTTGGGTTAGGGTCCC                                    |
| >74NAT Pangiprobe                                                                               |
| CTCACGCCATATCCGCCATTCTGACCTTTTCCAGTG-AAGAATATTTGGGTTAGGGTCCC                                    |
| >86NW Pangiprobe                                                                                |
| CTCACGCCATATCCGCCATTCTGACCTTTTCCAGTG-AAGAATATTTGGGTTAGGGTCCC                                    |
| >BRM688 Pangiprobe                                                                              |
| CTCACGCCATATCCGCCATTCTGACCTTTTCCAGTG-AAGAATATTTGGGTTAGGGTCCC                                    |
| >106NBT Pangiprobe                                                                              |
| CTCACGCCATATCCGCCATTCTGACCTTTTCCAGTG-AAGAATATTTGGGTTAGGGTCCC                                    |
| >184NAT Pangiprobe                                                                              |
| CTCACGCCATATCCGCCATTCTGACCTTTTCCAGTG-AAGAATATTTGGGTTAGGGTCCC                                    |
| >347NAT Pangiprobe                                                                              |
| CTCACGCCATATCCGCCATTCTGACCTTTTCCAGTG-AAGAATATTTGGGTTAGGGTCCC                                    |
| >351NAT Pangiprobe                                                                              |
| CTCACGCCATATCCGCCATTCTGACCTTTTCCAGTG-AAGAATATTTGGGTTAGGGTCCC                                    |



|                                                               |
|---------------------------------------------------------------|
| >368NAT Pangiprobe                                            |
| CTCACGCCATATCCGCCATTCTGACCTTTTTCCAGTG-AAGAATATTTGGGTTAGGGTCCC |
| >NAT-Nov-2020 Pangiprobe                                      |
| CTCACGCCATATCCGCCATTCTGACCTTTTTCCAGTG-AAGAATATTTGGGTTAGGGTCCC |
| >BRM689 Pangiprobe                                            |
| CTCACGCCATATCCGCCATTCTGACCTTTTTCCAGTG-AAGAATATTTGGGTTAGGGTCCC |
| >JFN1 Pangiprobe                                              |
| CTCACGCCATATCCGCCATTCTGACCTTTTTCCAGTG-AAGAATATTTGGGTTAGGGTCCC |

**Table S9. Amplicon sequences obtained from *Panax quinquefolius* commercial products**

|                                              |
|----------------------------------------------|
| >249NAT _Panqprobe                           |
| GGTTGCTTTCTGTCCATATAATGCATACAGCTCTAGTTGCCGGT |
| >OAC1570 _Panqprobe                          |
| GGTTGCTTTCTGTCCATATAATGCATACAGCTCTAGTTGCCGGT |
| >348NAT _Panqprobe                           |
| GGTTGCTTTCTGTCCATATAATGCATACAGCTCTAGTTGCCGGT |
| >PQ21 _Panqprobe                             |
| GGTTGCTTTCTGTCCATATAATGCATACAGCTCTAGTTGCCGGT |
| >PQ23 _Panqprobe                             |
| GGTTGCTTTCTGTCCATATAATGCATACAGCTCTAGTTGCCGGT |
| >339NAT _Panqprobe                           |
| GGTTGCTTTCTGTCCATATAATGCATACAGCTCTAGTTGCCGGT |
| >351NAT _Panqprobe                           |
| GGTTGCTTTCTGTCCATATAATGCATACAGCTCTAGTTGCCGGT |
| >406NW _Panqprobe                            |
| GGTTGCTTTCTGTCCATATAATGCATACAGCTCTAGTTGCCGGT |
| >415NAT _Panqprobe                           |
| GGTTGCTTTCTGTCCATATAATGCATACAGCTCTAGTTGCCGGT |
| >OAC26065 _Panqprobe                         |
| GGTTGCTTTCTGTCCATATAATGCATACAGCTCTAGTTGCCGGT |
| >PQ25 _Panqprobe                             |
| GGTTGCTTTCTGTCCATATAATNCATACAGCTCTAGTTGCCGGT |
| >1084NW _Panqprobe                           |
| GGTTGCTTTCTGTCCATATAATGCATACAGCTCTAGT-GCCGGT |
| >OAC57071 _Panqprobe                         |
| GGTTGCTTTCTGTCCATATAATGCATACAGCTCTAGT-GCCGGT |
| >OAC74790 _Panqprobe                         |
| GGTTGCTTTCTGTCCATATAATGCATACAGCTCTAGT-GCCGGT |
| >112NBT _Panqprobe                           |

|                                              |
|----------------------------------------------|
| GGTTGCTTTCTGTCCATATAATGCATACAGCTCTAGT-GCCGGT |
| >TNP1 _Panquprobe                            |
| GGTTGCTTTCTGTCCATATAATGCATACAGCTCTAGT-GCCGGT |
| >BRM705 _Panquprobe                          |
| GGTTGCTTTCTGTCCATATAATGCATACAGCTCTAGT-GCCGGT |
| >BRM871 _Panquprobe                          |
| GGTTGCTTTCTGTCCATATAATGCATACAGCTCTAGT-GCCGGT |
| >BRM903 _Panquprobe                          |
| GGTTGCTTTCTGTCCATATAATGCATACAGCTCTAGT-GCCGGT |
| >OAC24225 _Panquprobe                        |
| GGTTGCTTTCTGTCCATATAATGCATACAGCTCTAGT-GCCGGT |
| >PQ24 _Panquprobe                            |
| GGTTGCTTTCTGTCCATATAATGCATACAGCTCTAGT-GCCGGT |
| >PQ27 _Panquprobe                            |
| GGTTGCTTTCTGTCCATATAATGCATACAGCTCTAGT-GCCGGT |
| >PQ30 _Panquprobe                            |
| GGTTGCTTTCTGTCCATATAATGCATACAGCTCTAGT-GCCGGT |
| >OAC17943 _Panquprobe                        |
| GGTTGCTTTCTGTCCATATAATGCATACAGCTCTAGT-GCCGGT |
| >OAC92518 _Panquprobe                        |
| GGTTGCTTTCTGTCCATATAATGCATACAGCTCTAGT-GCCGGT |
| >PQ29 _Panquprobe                            |
| GGTTGCTTTCTGTCCATATAATGCATACAGCTCTAGT-GCCGGT |
| >PQ22 _Panquprobe                            |
| GGTTGCTTTCTGTCCATATAATGCATACAGCTCTAGT-GCCGGT |
| >OAC42034 _Panquprobe                        |
| GGTTGCTTTCTGTCCATATAATG-ATACAGCTCTAGT-GCCGGT |
| >14NAT _Panquprobe                           |
| GGTTGCTTTCTGTCCATATAATGCATACAGCTCTAGT-GCCGGT |
| >347NAT _Panquprobe                          |
| GGTTGCTTTCTGTCCATATAATGCATACAGCTCTAGT-GCCGGT |
| >BRM803 _Panquprobe                          |
| GGTTGCTTTCTGTCCATATAATGCATACAGCTCTAGT-GCCGGT |
| >PQ26 _Panquprobe                            |
| GGTTGCTTTCTGTCCATATAATGCATACAGCTCTAGT-GCCGGT |
| >OAC56612 _Panquprobe                        |
| GGTTGCTTTCTGTCCATATAATGCATACAGCTCTAGT-GCCGGT |
| >7PR _Panquprobe                             |
| GGTTGCTTTCTGTCCATATAATGCATACAGCTCTAGT-GCCGGT |
| >OAC22568 _Panquprobe                        |
| GGTTGCTTTCTGTCCATATAATGCATACAGCTCTAGT-GCCGGT |
| >8PR _Panquprobe                             |
| GGTTGCTTTCTGTCCATATAATGCATACAGCTCTAGT-GCCGGT |

|                                              |
|----------------------------------------------|
| >PQ28 _Panqprobe                             |
| ---NTCTTTCTGTCCATATAATGCATACAGCTCTAGT-GCCGGT |
| >24PR _Panqprobe                             |
| GGTTGCTTTCTGTCCATATAATGCATACAGCTCTAGT-GCCGGT |
| >17NAT _Panqprobe                            |
| GGTTGCTTTCTGTCCATATAATG-ATACAGCTCTAGTTGCCGGT |
| >OAC56582 _Panqprobe                         |
| GGTTGCTTTCTGTCCATATAATGCATACAGCTCTAGT-GCCGGT |

Panax ginseng amplicon:AAAGTCTTGGATAGCCGCGATAAA
TCCAAATCTGG
CTCACG
CCATATCCGCCATTCTGA
CCTTTTCCAGTGAAAGAATATTGGGTTAGGGTCCCCA

Panax quinquefolius:
AAAGTCTTGGATAGCCGCGATAAA
TCCAAATCTGG
CTCAC
CCATATCCGCCATTCTGA
CCTTTTCCAGTGAAAGAATATTGGGTTAGGGTCCCCA

Primer 1
Probe
Primer 2

Fig S1. *Panax ginseng* amplicon sequence showing variability with *Panax quinquefolius*

Panax quinquefolius amplicon:CGGCCGGTTGCTTCTGTCCATATAATG
CATACAGCTCTAGTTGC
GGTT
GGGCGGGTTCGATGGCTCTATGAATTAGCAGTTTT
TGATCCCTCTGACCCGTTCCTT

Panax ginseng:
CGGCCGGTTGCTTCTGTCCATATAATG
CATACAGCTCTAGTTGC
GGTT
GGGCGGGTTCGATGGCTCTATGAATTAGCAGTTTT
TGATCCCTCTGACCCGTTCCTT

Primer 1
Probe
Primer 2

Fig S2. *Panax quinquefolius* amplicon sequence showing variability with *Panax ginseng*
